# Supplementary material for: Surgery Combined with Radiotherapy Improved Survival in Metastatic Esophageal Cancer in a Surveillance Epidemiology and End Results Population-based Study
Source: PubMed Central journal article supplement (PMC4915008; doi:10.1038/srep28280), 2016-06-21
Supplement: srep28280-s1.pdf [file srep28280-s1.pdf]

## **SUPPLEMENTARY INFORMATION**

### **Surgery Combined with Radiotherapy Improved Survival in Metastatic Esophageal Cancer in a Surveillance Epidemiology and End Results Population-based Study**

San-Gang Wu<sup>1,\*</sup>, Wei-Hao Xie<sup>2,\*</sup>, Zhao-Qiang Zhang<sup>3,\*</sup>, Jia-Yuan Sun<sup>2</sup>, Feng-Yan Li<sup>2</sup>, Huan-Xin Lin<sup>2</sup>, Yong-Bao<sup>2</sup>, Zhen-Yu He<sup>2</sup>

<sup>1</sup> Department of Radiation Oncology, the First Affiliated Hospital of Xiamen University, Xiamen 361003, People's Republic of China

<sup>2</sup> Department of Radiation Oncology, Sun Yat-sen University Cancer Center, State Key Laboratory of Oncology in South China, Collaborative Innovation Center of Cancer Medicine, Guangzhou 510060, People's Republic of China

<sup>3</sup> Eye Institute of Xiamen University, Fujian Provincial Key Laboratory of Ophthalmology and Visual Science, Medical College of Xiamen University, Xiamen 361000, People's Republic of China

\* San-Gang Wu, Wei-Hao Xie, and Zhao-Qiang Zhang contributed equally to this work.

Corresponding author:

Yong Bao

Department of Radiation Oncology, Sun Yat-sen University Cancer Center, State Key

Laboratory of Oncology in South China, Collaborative Innovation Center of Cancer  
Medicine, 651 Dongfeng Road East, Guangzhou 510060, People's Republic of China; Tel:  
+86 20 87343543; Fax: +86 20 87343392 E-mail. [baoyong@sysucc.org.cn](mailto:baoyong@sysucc.org.cn)

Zhen-Yu He,

Department of Radiation Oncology, Sun Yat-sen University Cancer Center, State Key  
Laboratory of Oncology in South China, Collaborative Innovation Center of Cancer  
Medicine, 651 Dongfeng Road East, Guangzhou 510060, People's Republic of China; Tel:  
+86 20 87343543; Fax: +86 20 87343392 E-mail. [hezhy@sysucc.org.cn](mailto:hezhy@sysucc.org.cn)

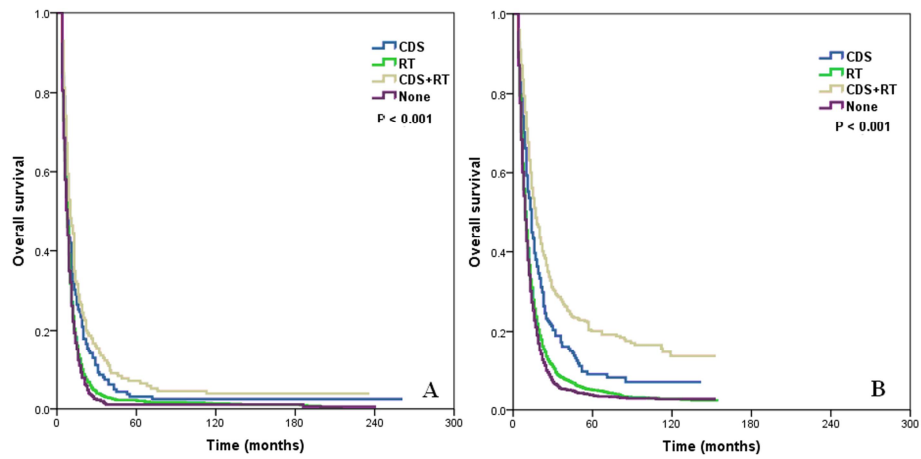

**Figure S1.** Overall survival of patients with metastatic esophageal cancer undergoing different local treatment modalities by year of diagnosis (A, years 1988-1999; B, years 2000-2012) (CDS, cancer-directed surgery; RT, radiotherapy).

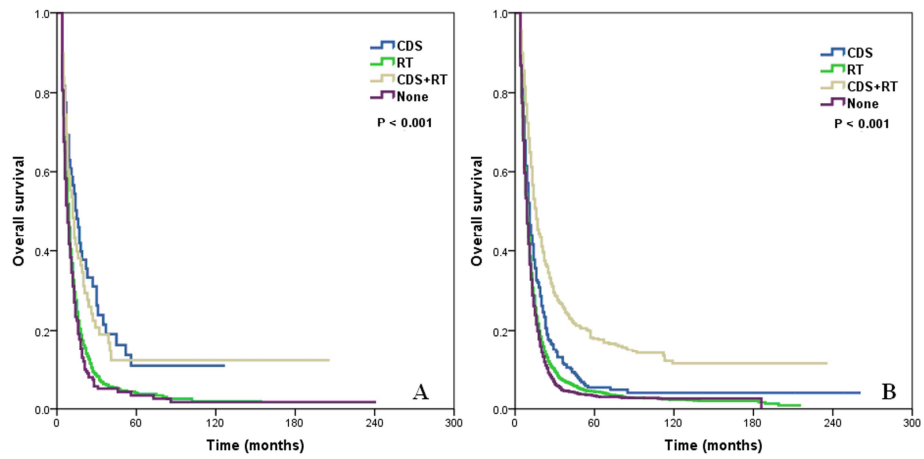

**Figure S2.** Overall survival of patients with metastatic esophageal cancer undergoing different local treatment modalities by ethnicity (A, black patients; B, white patients) (CDS, cancer-directed surgery; RT, radiotherapy).

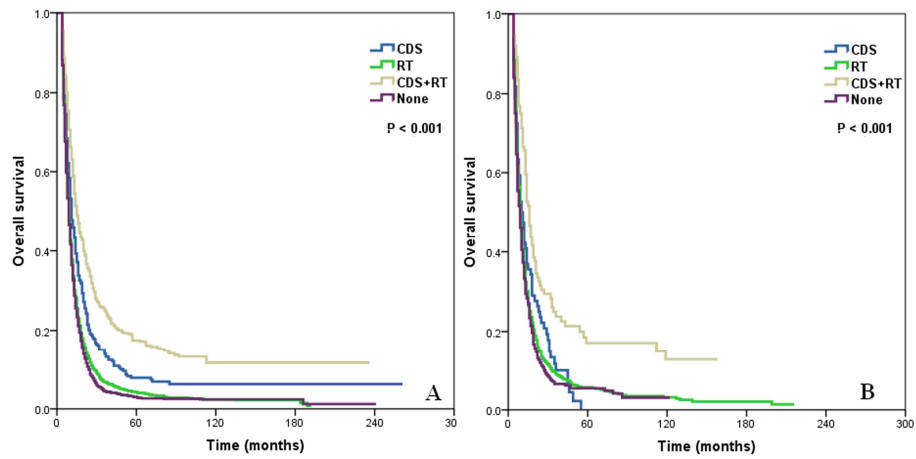

**Figure S3.** Overall survival of patients with metastatic esophageal cancer undergoing different local treatment modalities by sex (A, male; B, female) (CDS, cancer-directed surgery; RT, radiotherapy).

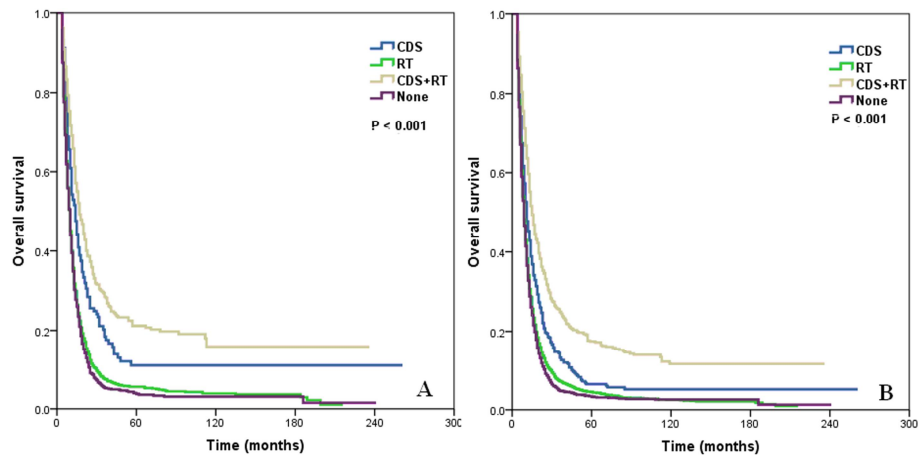

**Figure S4.** Overall survival of patients with metastatic esophageal cancer undergoing different local treatment modalities by age (A, aged  $\leq 60$  years; B, aged  $> 60$  years) (CDS, cancer-directed surgery; RT, radiotherapy).

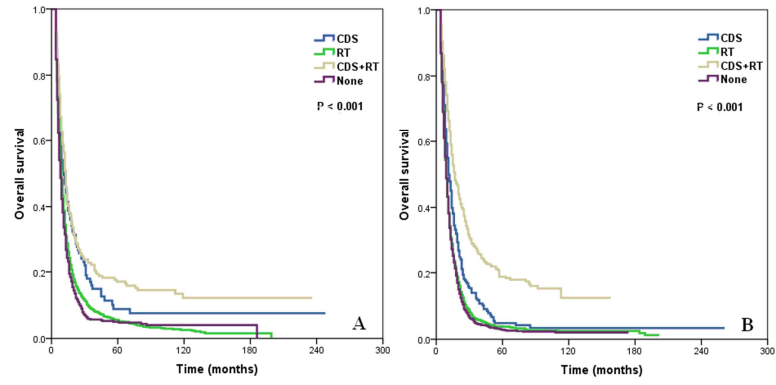

**Figure S5.** Overall survival of patients with metastatic esophageal cancer undergoing different local treatment modalities by tumor histology (A, squamous cell carcinomas; B, adenocarcinoma) (CDS, cancer-directed surgery; RT, radiotherapy).

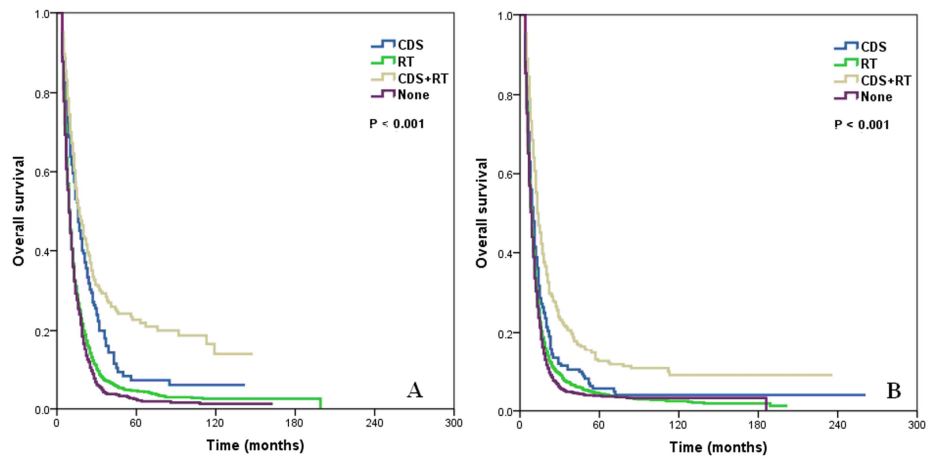

**Figure S6.** Overall survival of patients with metastatic esophageal cancer undergoing different local treatment modalities by tumor grade (A, well/moderately differentiated; B, poorly/undifferentiated differentiated) (CDS, cancer-directed surgery; RT, radiotherapy).



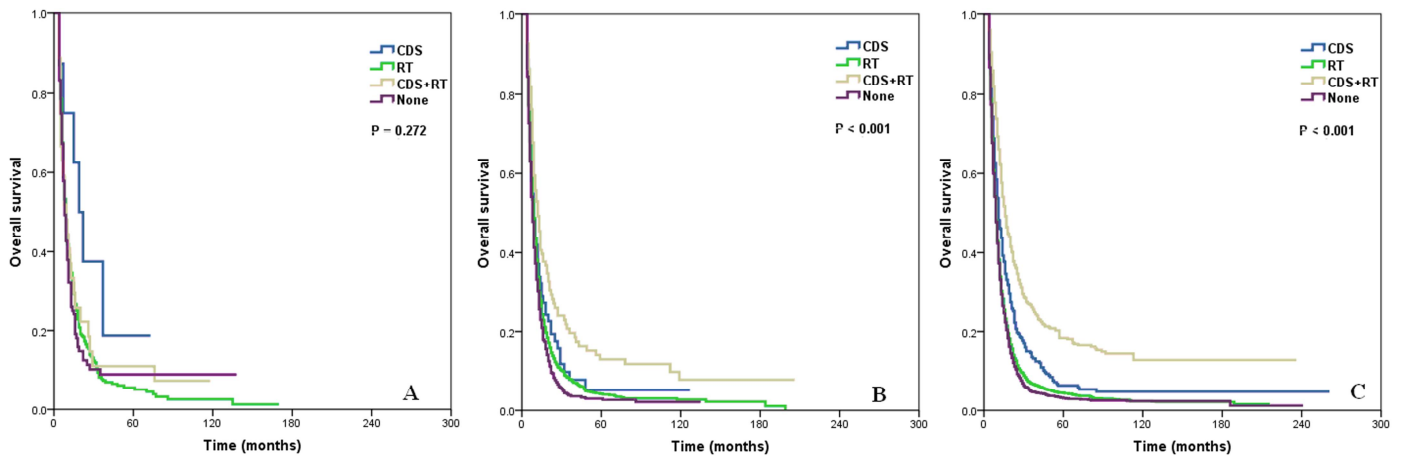

**Figure S7.** Overall survival of patients with metastatic esophageal cancer undergoing different local treatment modalities by tumor location (A, upper thoracic; B, middle thoracic; C, lower thoracic) (CDS, cancer-directed surgery; RT, radiotherapy).
